# Supplementary material for: Advanced in Vitro Safety Assessment of Herbal Medicines for the Treatment of Non-Psychotic Mental Disorders in Pregnancy
Source: PubMed Central journal article supplement (PMC9259859; doi:10.3389/fphar.2022.882997), 2022-06-23
Supplement: DataSheet1.pdf [file DataSheet1.pdf]

## **Supporting Information**

### **Advanced *in vitro* safety assessment of herbal medicines for the treatment of non-psychotic mental disorders in pregnancy**

Deborah Spiess<sup>1</sup>, Moritz Winker<sup>2,3</sup>, Alexandra Dolder Behna<sup>1</sup>, Carsten Gründemann<sup>2,3</sup>, Ana Paula Simões-Wüst<sup>1\*</sup>

#### **Affiliations**

<sup>1</sup>Department of Obstetrics, University Hospital Zurich, University of Zurich, Zurich, Switzerland

<sup>2</sup>Center for Complementary Medicine, Faculty of Medicine, University of Freiburg, Freiburg, Germany

<sup>3</sup>Translational Complementary Medicine, Department of Pharmaceutical Sciences, University of Basel, Basel, Switzerland

#### **\*Correspondence**

***PD Dr. Ana Paula Simões-Wüst***

University Hospital of Zurich

Department of Obstetrics

Schmelzbergstrasse 12/PF 125, Path G51a

8091 Zurich

Switzerland

Phone: +41 44 255 51 31

Fax: +41 44 255 44 30

[anapaula.simo-es-wuest@usz.ch](mailto:anapaula.simo-es-wuest@usz.ch)

**Table 1S.** Identified proteins which were significantly influenced (up- or downregulated) after incubations with plant extracts for a period of 48 h in comparison with vehicle only (DMSO treatment).

| Plant extract    | Gene  | Protein                                                                     | Function (Szkларczyk et al., 2018; The UniProt Consortium, 2019)                                                                                                                                                                       | log <sub>2</sub> FC | p-value  | Adjusted p-value |
|------------------|-------|-----------------------------------------------------------------------------|----------------------------------------------------------------------------------------------------------------------------------------------------------------------------------------------------------------------------------------|---------------------|----------|------------------|
| St. John's wort  | RN149 | E3 ubiquitin-protein ligase                                                 | Enables E3 ubiquitin-protein ligase activity                                                                                                                                                                                           | 2.60                | 8.65E-06 | 0.018            |
|                  | TAP26 | Thyroid transcription factor 1-associated protein 26                        | Component of the transcription complexes of the pulmonary surfactant-associated protein-B (SFTPB) and -C (SFTPC) which enhances the homeobox protein Nkx-2.1-activated SFTPB and SFTPC promoter activities                             | 1.80                | 7.52E-05 | 0.076            |
|                  | MBOA7 | Lysophospholipid acyltransferase 7                                          | Contributes to the regulation of free arachidonic acid in the cell through the remodeling of phospholipids                                                                                                                             | 1.27                | 7.29E-05 | 0.076            |
|                  | PPR21 | Protein phosphatase 1 regulatory subunit 21                                 | Regulator of protein phosphatase 1                                                                                                                                                                                                     | -2.73               | 9.15E-05 | 0.076            |
| California poppy | ANR35 | Ankyrin repeat domain-containing protein 35                                 | Unknown                                                                                                                                                                                                                                | 4.68                | 1.92E-05 | 0.066            |
| Valerian         | COPRS | Coordinator of PRMT5 and differentiation stimulator                         | Histone-binding protein which plays a role in muscle cell differentiation                                                                                                                                                              | 2.92                | 1.02E-04 | 0.119            |
|                  | AN32B | Acidic leucine-rich nuclear phosphoprotein 32 family member B               | Multifunctional protein which is involved in the regulation of many processes e.g. cell proliferation, apoptosis, cell cycle progression or transcription                                                                              | 2.67                | 3.98E-06 | 0.014            |
|                  | FLOT2 | Flotillin-2                                                                 | Functionally participating in formation of caveolae or caveolae-like vesicles                                                                                                                                                          | -1.38               | 3.31E-05 | 0.058            |
| Lavender         | CALB2 | Calretinin                                                                  | Calcium-binding protein which is abundant in auditory neurons                                                                                                                                                                          | 1.82                | 1.50E-04 | 0.111            |
|                  | SPTB1 | Spectrin beta chain, erythrocytic                                           | Major constituent of the cytoskeletal network underlying the erythrocyte plasma membrane                                                                                                                                               | 1.36                | 7.69E-04 | 0.142            |
|                  | GEMI  | Geminin                                                                     | Inhibits DNA replication                                                                                                                                                                                                               | 1.13                | 1.08E-03 | 0.166            |
|                  | BGLR  | Beta-glucuronidase                                                          | Plays an important role in the degradation of dermatan and keratan sulfates                                                                                                                                                            | -1.01               | 4.24E-04 | 0.123            |
|                  | UBQL2 | Ubiquilin-2                                                                 | Plays an important role in the regulation of different protein degradation mechanisms and pathways including ubiquitin-proteasome system (UPS), autophagy and the endoplasmic reticulum-associated protein degradation (ERAD) pathway. | -1.04               | 5.88E-05 | 0.080            |
|                  | RIOX2 | Ribosomal oxygenase 2                                                       | Leads to an increase in ribosomal RNA expression; may play an important role in cell growth and survival and may be involved in ribosome biogenesis                                                                                    | -1.06               | 3.70E-04 | 0.123            |
|                  | STT3B | Dolichyl-diphosphooligosaccharide-protein glycosyltransferase subunit STT3B | Plays a role in ER-associated degradation (ERAD) pathway that mediates ubiquitin-dependent degradation of misfolded endoplasmic reticulum proteins; required for efficient post-translational glycosylation                            | -1.07               | 1.25E-03 | 0.181            |

|       |                                                                             |                                                                                                                                                                                                                |       |          |       |
|-------|-----------------------------------------------------------------------------|----------------------------------------------------------------------------------------------------------------------------------------------------------------------------------------------------------------|-------|----------|-------|
| STT3A | Dolichyl-diphosphooligosaccharide-protein glycosyltransferase subunit STT3A | Similar catalytic subunit with an overlapping function as STT3B                                                                                                                                                | -1.09 | 4.21E-04 | 0.123 |
| SET   | Protein SET                                                                 | Multitasking protein, involved in apoptosis, transcription, nucleosome assembly and histone chaperoning                                                                                                        | -1.17 | 2.74E-04 | 0.123 |
| PEBB  | Core-binding factor subunit beta                                            | Master-regulates a host of genes specific to hematopoiesis and osteogenesis                                                                                                                                    | -1.22 | 5.46E-04 | 0.142 |
| SC11A | Signal peptidase complex catalytic subunit SEC11A                           | Component of the microsomal signal peptidase complex which removes signal peptides from nascent proteins as they are translocated into the lumen of the endoplasmic reticulum                                  | -1.23 | 8.02E-04 | 0.142 |
| TTC9C | Tetratricopeptide repeat protein 9C                                         | Protein coding gene; important paralog of the TTC9 gene which has been shown to be hormonally regulated in breast cancer cells and may play a role in cancer cell invasion and metastasis                      | -1.24 | 2.23E-04 | 0.115 |
| TBA1B | Tubulin alpha-1B chain                                                      | Major constituent of microtubules                                                                                                                                                                              | -1.25 | 7.26E-04 | 0.142 |
| CCS   | Copper chaperone for superoxide dismutase                                   | Delivers copper to copper zinc superoxide dismutase                                                                                                                                                            | -1.31 | 2.25E-04 | 0.115 |
| CACO2 | Calcium-binding and coiled-coil domain-containing protein 2                 | Required for autophagy-mediated intracellular bacteria degradation                                                                                                                                             | -1.32 | 3.43E-04 | 0.123 |
| GALK1 | Galactokinase                                                               | Major enzyme for galactose metabolism                                                                                                                                                                          | -1.50 | 1.08E-04 | 0.110 |
| TLE1  | Transducin-like enhancer protein 1                                          | Transcriptional corepressor that binds to a number of transcription factors                                                                                                                                    | -1.71 | 1.48E-05 | 0.030 |
| TYSY  | Thymidylate synthase                                                        | Contributes to the de novo mitochondrial thymidylate biosynthesis pathway                                                                                                                                      | -1.72 | 5.96E-04 | 0.142 |
| COQ9  | Ubiquinone biosynthesis protein COQ9, mitochondrial                         | Lipid-binding protein involved in the biosynthesis of coenzyme Q, also named ubiquinone, an essential lipid-soluble electron transporter for aerobic cellular respiration                                      | -1.81 | 5.67E-04 | 0.142 |
| RL36  | 60S ribosomal protein L36                                                   | Component of the large ribosomal subunit                                                                                                                                                                       | -1.94 | 1.64E-04 | 0.111 |
| TF2AA | Transcription initiation factor IIA subunit 1                               | Component of the transcription machinery of RNA polymerase II and plays an important role in transcriptional activation                                                                                        | -2.15 | 4.00E-04 | 0.123 |
| URM1  | Ubiquitin-related modifier 1                                                | Involved in a specific pathway, which is part of tRNA modification                                                                                                                                             | -2.31 | 4.15E-07 | 0.002 |
| S61A1 | Protein transport protein Sec61 subunit alpha isoform 1                     | Plays a crucial role in the insertion of secretory and membrane polypeptides into the endoplasmic reticulum                                                                                                    | -2.45 | 7.85E-04 | 0.142 |
| EIF3D | Eukaryotic translation initiation factor 3 subunit D                        | mRNA cap-binding component of the eukaryotic translation initiation factor 3 (eIF-3) complex, a complex required for several steps in the initiation of protein synthesis of a specialized repertoire of mRNAs | -2.86 | 1.08E-03 | 0.166 |
| Hops  | NAGAB Alpha-N-acetylgalactosaminidase                                       | Required for the breakdown of glycolipids                                                                                                                                                                      | 2.30  | 3.59E-06 | 0.013 |

**Table 2S.** Label-free quantification of proteins which were only identified in either the treated (St. John's wort extract) or untreated (0.06% DMSO) sample.

|                           | Gene  | Protein                                               | Function (Szklarczyk et al., 2018; The UniProt Consortium, 2019)                                                                                                                                                                                                                                            |
|---------------------------|-------|-------------------------------------------------------|-------------------------------------------------------------------------------------------------------------------------------------------------------------------------------------------------------------------------------------------------------------------------------------------------------------|
| Treated (St. John's wort) | CDIPT | CDP-diacylglycerol-inositol 3-phosphatidyltransferase | Catalyzes the biosynthesis of phosphatidylinositol (PtdIns) as well as PtdIns:inositol exchange reaction                                                                                                                                                                                                    |
|                           | PPAL  | Lysosomal acid phosphatase                            | Hydrolyzes orthophosphoric monoesters to alcohol and phosphate                                                                                                                                                                                                                                              |
|                           | AT12A | Potassium-transporting ATPase alpha chain 2           | Catalytic subunit of a H <sup>+</sup> /K <sup>+</sup> and/or Na <sup>+</sup> /K <sup>+</sup> -ATPase pump which transports K <sup>+</sup> ions (into the cell) in exchange for Na <sup>+</sup> and/or H <sup>+</sup> ions (to the extracellular compartment) across the apical membrane of epithelial cells |
| Untreated (0.06% DMSO)    | TGT   | Queuine tRNA-ribosyltransferase catalytic subunit 1   | Catalyzes the base-exchange of a guanine (G) residue with queuine (Q) at position 34 (anticodon wobble position) in tRNAs with GUN anticodons (tRNA-Asp, -Asn, -His and -Tyr), resulting in the hypermodified nucleoside queuosine                                                                          |
|                           | 5NT3A | Cytosolic 5'-nucleotidase 3A                          | Specific activity towards cytidine monophosphate (CMP) and 7-methylguanosine monophosphate (m <sub>7</sub> GMP); CMP seems to be the preferred substrate                                                                                                                                                    |

**Table 3S.** Label-free quantification of proteins which were only identified in either the treated (valerian extract) or untreated (0.06% DMSO) sample.

|                        | Gene  | Protein                                                  | Function (Szklarczyk et al., 2018; The UniProt Consortium, 2019)                                                                                                                                                                                                                                                                                                                               |
|------------------------|-------|----------------------------------------------------------|------------------------------------------------------------------------------------------------------------------------------------------------------------------------------------------------------------------------------------------------------------------------------------------------------------------------------------------------------------------------------------------------|
| Treated (valerian)     | WIPF1 | WAS/WASL-interacting protein family member 1             | Plays a role in the reorganization of the actin cytoskeleton; contributes with NCK1 and GRB2 in the recruitment and activation of WASL; may participate in regulating the subcellular localization of WASL, resulting in the disassembly of stress fibers in favor of filopodia formation; plays a role in the formation of cell ruffles                                                       |
|                        | MBP   | Myelin basic protein                                     | Is, with PLP, the most abundant protein component of the myelin membrane in the CNS; formation and stabilization of this compact multilayer arrangement of bilayers                                                                                                                                                                                                                            |
| Untreated (0.06% DMSO) | MYL3  | Myosin light chain 3                                     | Regulatory light chain of myosin; does not bind calcium                                                                                                                                                                                                                                                                                                                                        |
|                        | 1B41  | HLA class I histocompatibility antigen, B-41 alpha chain | Antigen-presenting major histocompatibility complex class I (MHCI) molecule; in complex with B2M/beta 2 microglobulin displays primarily viral and tumor-derived peptides on antigen-presenting cells for recognition by alpha-beta T cell receptor (TCR) on HLA-B-restricted CD8-positive T cells, guiding antigen-specific T cell immune response to eliminate infected or transformed cells |
|                        | CAVN1 | Caveolae-associated protein 1                            | Plays an important role in caveolae formation and organization; essential for the formation of caveolae in all tissues                                                                                                                                                                                                                                                                         |

**Table 4S.** Label-free quantification of proteins which were only identified in either the treated (hops extract) or untreated (0.06% DMSO) sample.

| Gene                   | Protein | Function (Szklarczyk et al., 2018; The UniProt Consortium, 2019)      |                                                                                                                                                                                                                                                                                                                                                                                                                                                                                                                                                                           |
|------------------------|---------|-----------------------------------------------------------------------|---------------------------------------------------------------------------------------------------------------------------------------------------------------------------------------------------------------------------------------------------------------------------------------------------------------------------------------------------------------------------------------------------------------------------------------------------------------------------------------------------------------------------------------------------------------------------|
| Treated (hops)         | NGRN    | Neugrin                                                               | Plays an essential role in mitochondrial ribosome biogenesis                                                                                                                                                                                                                                                                                                                                                                                                                                                                                                              |
|                        | ANKZ1   | Ankyrin repeat and zinc finger domain-containing protein 1            | Plays a role in the cellular response to hydrogen peroxide and in the maintenance of mitochondrial integrity under conditions of cellular stress; involved in the endoplasmic reticulum (ER)-associated degradation (ERAD) pathway                                                                                                                                                                                                                                                                                                                                        |
|                        |         | DPY30                                                                 | Protein dpy-30 homolog                                                                                                                                                                                                                                                                                                                                                                                                                                                                                                                                                    |
|                        | CLAP1   | CLIP-associating protein 1                                            | Microtubule plus-end tracking protein that promotes the stabilization of dynamic microtubules; involved in the nucleation of noncentrosomal microtubules originating from the trans-Golgi network (TGN)                                                                                                                                                                                                                                                                                                                                                                   |
|                        | ITA3    | Integrin alpha-3                                                      | Integrin alpha-3/beta-1 is a receptor for fibronectin, laminin, collagen, epiligrin, thrombospondin and CSPG4                                                                                                                                                                                                                                                                                                                                                                                                                                                             |
|                        | SP100   | Nuclear autoantigen Sp-100                                            | Together with PML, this tumor suppressor is a major constituent of the PML bodies, a subnuclear organelle involved in a large number of physiological processes including cell growth, differentiation and apoptosis; may play a role in angiogenesis, controlling endothelial cell motility and invasion                                                                                                                                                                                                                                                                 |
|                        | LRCH4   | Leucine-rich repeat and calponin homology domain-containing protein 4 | This gene encodes a protein that contains leucine-rich repeats (LRR) at its amino terminus and that is known to be involved in ligand binding; carboxyl terminus may act as a membrane anchor                                                                                                                                                                                                                                                                                                                                                                             |
|                        | SET1A   | Histone-lysine N-methyltransferase SETD1A                             | Methylates 'Lys-4' of histone H3, when part of the SET1 histone methyltransferase (HMT) complex, but not if the neighboring 'Lys-9' residue is already methylated; H3 'Lys-4' methylation represents a specific tag for epigenetic transcriptional activation; may play a role in synaptic function and the development of neurons                                                                                                                                                                                                                                        |
| Untreated (0.06% DMSO) | HMCEs   | Abasic site processing protein HMCEs                                  | Acts as an enzyme that recognizes and binds abasic sites in ssDNA at replication forks and chemically modifies the lesion by forming a covalent cross-link with DNA; promotes error-free repair of abasic sites by acting as a 'suicide' enzyme that is degraded, thereby protecting abasic sites from translesion synthesis (TLS) polymerases and endonucleases that are error-prone and would generate mutations and double-strand breaks; acts as a protease: mediates autocatalytic processing of its N-terminal methionine in order to expose the catalytic cysteine |
|                        |         | GPX4                                                                  | Phospholipid hydroperoxide glutathione peroxidase                                                                                                                                                                                                                                                                                                                                                                                                                                                                                                                         |
|                        | PRIo    | Major prion protein                                                   | Unclear primary physiological function; may play a role in neuronal development and synaptic plasticity; may play a role in iron uptake and iron homeostasis                                                                                                                                                                                                                                                                                                                                                                                                              |

**Table 5S.** Label-free quantification of proteins which were only identified in either the treated (California Poppy extract) or untreated (0.06% DMSO) sample.

| Gene                       | Protein                                                                                                                                                                                                                                                                                                                                 | Function (Szklarczyk et al., 2018; The UniProt Consortium, 2019)                                                                                                                                                                                                                                                                                                                                                                                                                                                                                                                                                                                                                                                                                                                                                                                                                                                                                                                                                                                                      |
|----------------------------|-----------------------------------------------------------------------------------------------------------------------------------------------------------------------------------------------------------------------------------------------------------------------------------------------------------------------------------------|-----------------------------------------------------------------------------------------------------------------------------------------------------------------------------------------------------------------------------------------------------------------------------------------------------------------------------------------------------------------------------------------------------------------------------------------------------------------------------------------------------------------------------------------------------------------------------------------------------------------------------------------------------------------------------------------------------------------------------------------------------------------------------------------------------------------------------------------------------------------------------------------------------------------------------------------------------------------------------------------------------------------------------------------------------------------------|
| Treated (California poppy) | NOL3                                                                                                                                                                                                                                                                                                                                    | Nucleolar protein 3<br><br><p><a href="#">Isoform 1</a>: May be involved in RNA splicing<br/> <a href="#">Isoform 2</a>: Functions as an apoptosis repressor that blocks multiple modes of cell death; inhibits extrinsic apoptotic pathways; inhibits intrinsic apoptotic pathway in response to a wide range of stresses, through its interaction with BAX resulting in BAX inactivation, preventing mitochondrial dysfunction and release of pro-apoptotic factors; Inhibits calcium-mediated cell death by functioning as a cytosolic calcium buffer, dissociating its interaction with CASP8 and maintaining calcium homeostasis; negatively regulates hypoxia-induced apoptosis in part by inhibiting the release of cytochrome c from mitochondria in a caspase-independent manner; inhibits TNF-induced necrosis by preventing TNF-signaling pathway through TNFRSF1A interaction abrogating the recruitment of RIPK1 to complex I; promotes vascular remodeling through inhibition of apoptosis and stimulation of proliferation, in response to hypoxia</p> |
|                            | NUDT3                                                                                                                                                                                                                                                                                                                                   | Diphosphoinositol polyphosphate phosphohydrolase 1<br><br><p>May play a role in signal transduction; acts as a negative regulator of the ERK1/2 pathway</p>                                                                                                                                                                                                                                                                                                                                                                                                                                                                                                                                                                                                                                                                                                                                                                                                                                                                                                           |
|                            | GSTM1                                                                                                                                                                                                                                                                                                                                   | Glutathione S-transferase Mu 1<br><br><p>Conjugation of reduced glutathione to a wide number of exogenous and endogenous hydrophobic electrophiles; involved in the formation of glutathione conjugates of prostaglandin A2 (PGA2) and prostaglandin J2 (PGJ2)</p>                                                                                                                                                                                                                                                                                                                                                                                                                                                                                                                                                                                                                                                                                                                                                                                                    |
|                            | PURB                                                                                                                                                                                                                                                                                                                                    | Transcriptional activator protein Pur-beta<br><br><p>Capacity to bind repeated elements in single-stranded DNA; plays a role in the control of vascular smooth muscle (VSM) alpha-actin gene transcription as repressor in myoblasts and fibroblasts; participates in transcriptional and translational regulation of alpha-MHC expression in cardiac myocytes by binding to the purine-rich negative regulatory (PNR) element</p>                                                                                                                                                                                                                                                                                                                                                                                                                                                                                                                                                                                                                                    |
|                            | YJU2                                                                                                                                                                                                                                                                                                                                    | Splicing factor YJU2<br><br><p>Part of the spliceosome which catalyzes two sequential transesterification reactions, first the excision of the non-coding intron from pre-mRNA and then the ligation of the coding exons to form the mature mRNA; may protect cells from TP53-dependent apoptosis upon dsDNA break damage through association with PRP19-CD5L complex</p>                                                                                                                                                                                                                                                                                                                                                                                                                                                                                                                                                                                                                                                                                             |
| SPCS1                      | Signal peptidase complex subunit 1<br><br><p>Component of the microsomal signal peptidase complex which removes signal peptides from nascent proteins as they are translocated into the lumen of the endoplasmic reticulum; plays a key role in the post-translational processing of flaviviral structural proteins prM, E, and NS1</p> |                                                                                                                                                                                                                                                                                                                                                                                                                                                                                                                                                                                                                                                                                                                                                                                                                                                                                                                                                                                                                                                                       |

**Table 6S.** Label-free quantification of proteins which were only identified in either the treated (lavender extract) or untreated (0.06% DMSO) sample.

| Gene               | Protein                | Function (Szklarczyk et al., 2018; The UniProt Consortium, 2019)                                                                                                                                                                                                                                                                                                                                                                                                                                                                                                                                                                                                                                                                 |
|--------------------|------------------------|----------------------------------------------------------------------------------------------------------------------------------------------------------------------------------------------------------------------------------------------------------------------------------------------------------------------------------------------------------------------------------------------------------------------------------------------------------------------------------------------------------------------------------------------------------------------------------------------------------------------------------------------------------------------------------------------------------------------------------|
| Treated (lavender) | AAAS                   | Aladin<br>Plays a role in the normal development of the peripheral and central nervous system<br>Plays a key role in the repair of DNA damage, functioning as part of both the non-homologous end-joining (NHEJ) and base excision repair (BER) pathways; through its two catalytic activities, PNK ensures that DNA termini are compatible with extension and ligation by either removing 3'-phosphates from, or by phosphorylating 5'-hydroxyl groups on, the ribose sugar of the DNA backbone                                                                                                                                                                                                                                 |
|                    | PNKP                   | Bifunctional polynucleotide phosphatase/kinase                                                                                                                                                                                                                                                                                                                                                                                                                                                                                                                                                                                                                                                                                   |
|                    | REX1B                  | Required for excision 1-B domain-containing protein<br>Uncharacterized protein                                                                                                                                                                                                                                                                                                                                                                                                                                                                                                                                                                                                                                                   |
|                    | FHL3                   | Four and a half LIM domains protein 3<br>Recruited by SOX15 to FOXX1 promoters where it acts as a transcriptional coactivator of FOXX1                                                                                                                                                                                                                                                                                                                                                                                                                                                                                                                                                                                           |
|                    | CO4A5                  | Collagen alpha-5(IV) chain<br>Type IV collagen is the major structural component of glomerular basement membranes (GBM), forming a 'chicken-wire' meshwork together with laminins, proteoglycans and entactin/nidogen<br>Plays an important role in integrin-mediated signaling and functions both in regulating cell migration and immune responses. Promotes formation of focal adhesion complexes, activation of the protein kinase PTK2/FAK1 and subsequent phosphorylation of MAPK1 and MAPK3; promotes production of proinflammatory cytokines by monocytes and macrophages; plays an important role in modulating inflammation and T-cell-mediated immune responses; promotes axon growth in the embryonic olfactory bulb |
|                    | SEM7A                  | Semaphorin-7A                                                                                                                                                                                                                                                                                                                                                                                                                                                                                                                                                                                                                                                                                                                    |
|                    | PJA2                   | E3 ubiquitin-protein ligase Praja-2<br>Responsible for ubiquitination of cAMP-dependent protein kinase type I and type II-alpha/beta regulatory subunits and for targeting them for proteasomal degradation; essential for PKA-mediated long-term memory processes                                                                                                                                                                                                                                                                                                                                                                                                                                                               |
|                    | MGST3                  | Microsomal glutathione S-transferase 3<br>Catalyzes the oxydation of hydroxy-fatty acids; catalyzes the conjugation of a reduced glutathione to leukotriene A4 in vitro; may participate in the lipid metabolism                                                                                                                                                                                                                                                                                                                                                                                                                                                                                                                 |
|                    | FBL1                   | rRNA/tRNA 2'-O-methyltransferase fibrillar-like protein 1<br>S-adenosyl-L-methionine-dependent methyltransferase that has the ability to methylate both RNAs and proteins; involved in pre-rRNA processing by catalyzing the site-specific 2'-hydroxyl methylation of ribose moieties in pre-ribosomal RNA; also acts as a protein methyltransferase by mediating methylation of glutamine residues                                                                                                                                                                                                                                                                                                                              |
|                    | Untreated (0.06% DMSO) | DC11                                                                                                                                                                                                                                                                                                                                                                                                                                                                                                                                                                                                                                                                                                                             |
| RASF8              |                        | Ras association domain-containing protein 8<br>Essential for maintaining adherens junction function in epithelial cells and has a role in epithelial cell migration.                                                                                                                                                                                                                                                                                                                                                                                                                                                                                                                                                             |

**Table 7S.** Relative concentrations of linalool present in cell culture medium at different positions of a 96-well or 24-well plate after 3 h or 24 h, respectively.

| Plate   | Time (h) | Position | Well  | Area (GC) | Linalool (%)* | Mean (%) |
|---------|----------|----------|-------|-----------|---------------|----------|
| 96-well | 0        | Stock    | -     | 21395     | 100           | 100      |
|         |          |          |       | 22767     |               |          |
|         |          |          |       | 23020     |               |          |
|         | 3        | Center   | D5    | 18468     | 86            | 85       |
|         |          |          |       | 18293     | 80            |          |
|         |          |          |       | 20494     | 89            |          |
|         |          | Border   | A5    | 12865     | 60            | 60       |
|         |          |          |       | 14684     | 64            |          |
|         |          |          |       | 12946     | 56            |          |
|         | 24-well  | 0        | Stock | -         | 410938        | 100      |
| 381251  |          |          |       |           |               |          |
| 369752  |          |          |       |           |               |          |
| 48      |          | Center   | B4    | 165974    | 40            | 44       |
|         |          |          |       | 172929    | 45            |          |
|         |          |          |       | 167115    | 45            |          |
|         |          | Border   | A1    | 153577    | 37            | 41       |
|         |          |          |       | 159509    | 42            |          |
|         |          |          |       | 163896    | 44            |          |
|         |          |          |       | 142483    | 35            |          |
|         |          |          |       | 117050    | 31            | 36       |
|         |          |          |       | 152353    | 41            |          |

\* Calculated as  $(\text{area } t_{24})/(\text{area stock } t_0)*100$

## References

- Szklarczyk, D., Gable, A.L., Lyon, D., Junge, A., Wyder, S., Huerta-Cepas, J., et al. (2018). STRING v11: protein–protein association networks with increased coverage, supporting functional discovery in genome-wide experimental datasets. *Nucleic Acids Res.* 47(D1), D607-D613. doi: 10.1093/nar/gky1131.
- The Uniprot Consortium (2019). UniProt: a worldwide hub of protein knowledge. *Nucleic Acids Res.* 47(D1), D506-D515. doi: 10.1093/nar/gky1049.
